# Supplementary material for: Features of non-activation dendritic state and immune deficiency in blastic plasmacytoid dendritic cell neoplasm (BPDCN)
Source: PubMed Central journal article supplement (PMC6898719; doi:10.1038/s41408-019-0262-0), 2019-12-06
Supplement: 41408_2019_262_MOESM1_ESM.pdf [file 41408_2019_262_MOESM1_ESM.pdf]

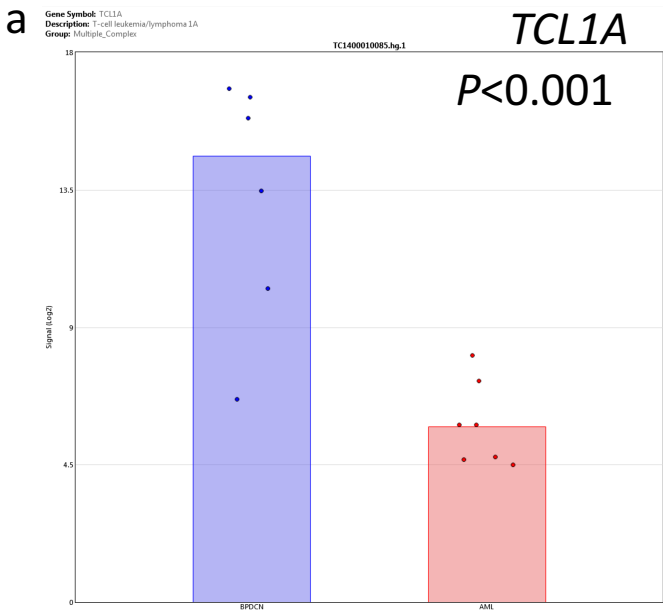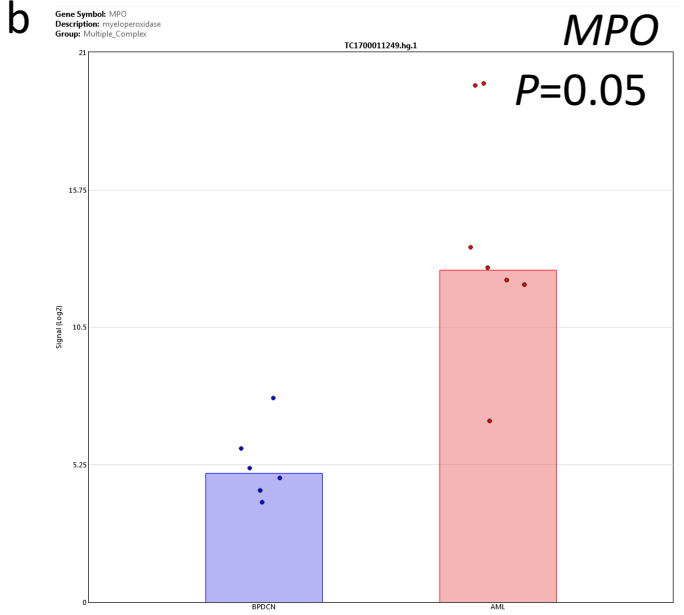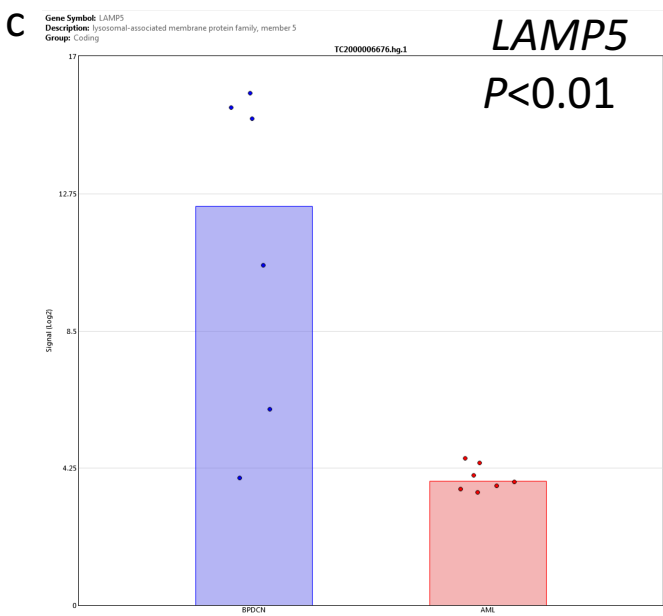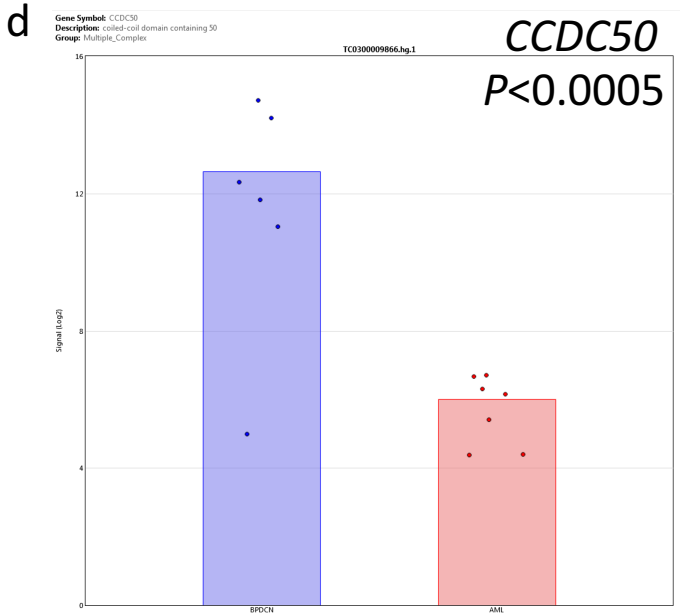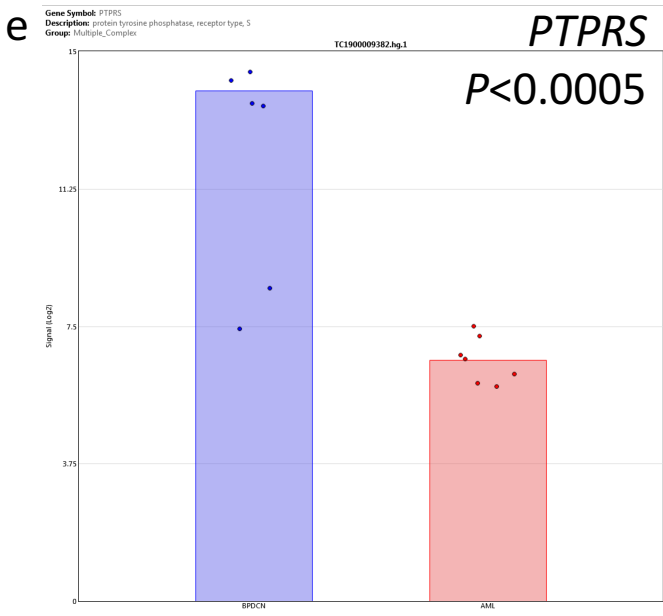

Supplemental Figure 1. Differentially expressed genes between BPDCN and AML. **(a-b)** Known markers *TCL1A* and *MPO*. **(c-d)** Dendritic cell markers *LAMP5* and *CCDC50* **(e)** *PTPRS*

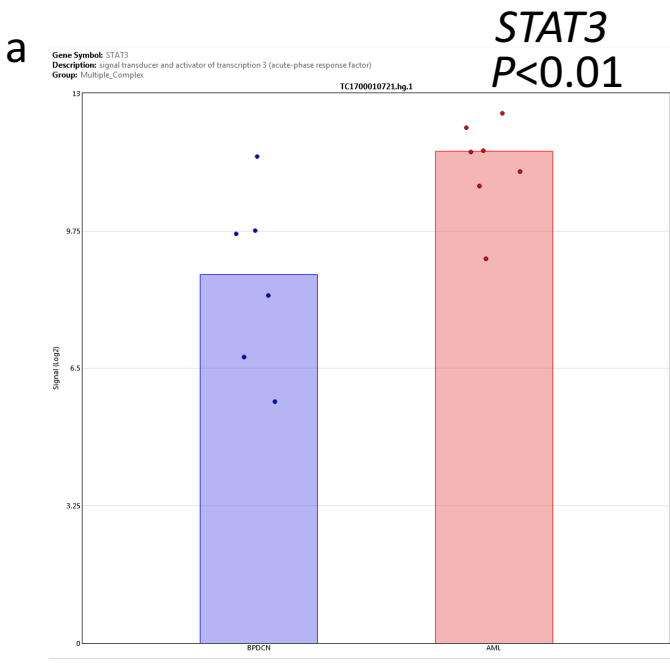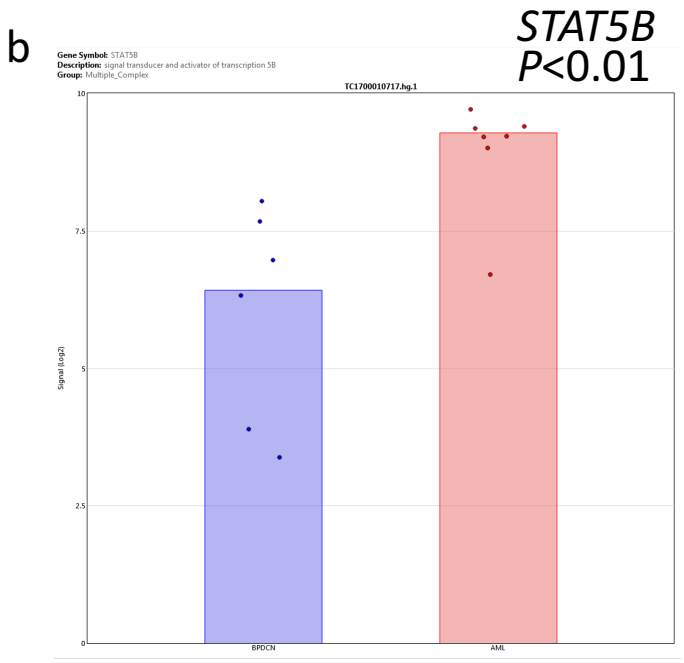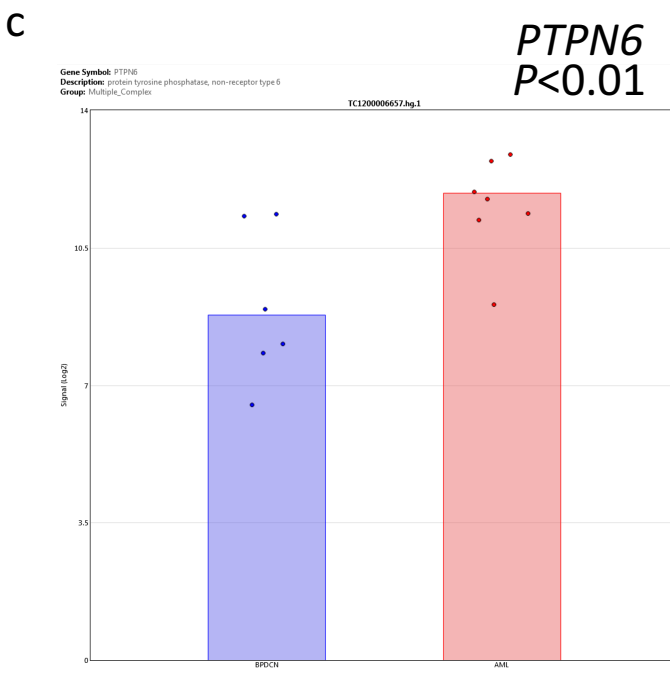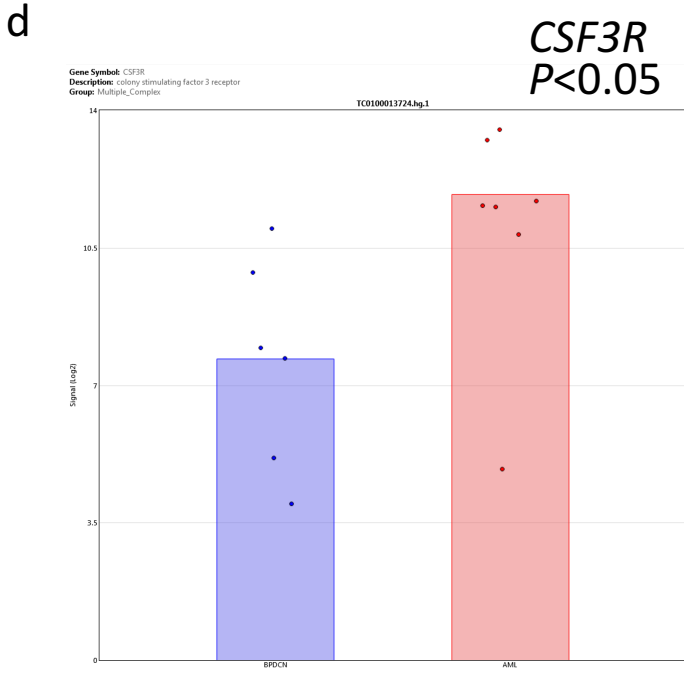

Supplemental Figure 2. Differentially expressed genes related to IL3 signaling expression (a) *STAT3* (b) *STAT5B* (c) *PTPN6* (d) *CSF3R*



Supplemental Figure 3. Ingenuity Pathway Analysis (IPA) of STAT3 signaling. The networks (a) were generated through the use of IPA (QIAGEN Inc., <https://www.qiagenbioinformatics.com/products/ingenuity-pathway-analysis>) using the filters shown (b)
